# Supplementary material for: Human Exposures to Bisphenol A, Bisphenol F and Chlorinated Bisphenol A Derivatives and Thyroid Function
Source: PubMed Central journal article supplement (PMC5082639; doi:10.1371/journal.pone.0155237), 2016-10-26
Supplement: pone.0155237.s001.pdf [file pone.0155237.s001.pdf]

Table S1. Summary of exposure habits between the two study locations and between cases and controls.

|                                                                             | Total (n=212)              |                            |                            | Cyprus (n=122)             |                            |                            | Romania (n=90)             |                            |                            |
|-----------------------------------------------------------------------------|----------------------------|----------------------------|----------------------------|----------------------------|----------------------------|----------------------------|----------------------------|----------------------------|----------------------------|
|                                                                             | Overall                    | Cases                      | Controls                   | Overall                    | Cases                      | Controls                   | Overall                    | Cases                      | Controls                   |
|                                                                             | <i>n</i>                   | 212                        | 106                        | 106                        | 122                        | 57                         | 65                         | 90                         | 49                         |
| <b>Daily consumption of water from 20L bottles (glasses; 1 glass=250mL)</b> | 0.00<br>[0.00, 0.00]       | 0.00<br>[0.00, 0.00]       | 0.00<br>[0.00, 0.00]       | 0.00<br>[0.00, 0.91]       | 0.00<br>[0.00, 0.00]       | 0.00<br>[0.00, 2.14]       | 0.00<br>[0.00, 0.00]       | 0.00<br>[0.00, 0.00]       | 0.00<br>[0.00, 0.00]       |
| <b>Frequency of use of the microwave oven (times per week)</b>              | 0.00<br>[0.00, 0.00]       | 0.00<br>[0.00, 0.00]       | 0.00<br>[0.00, 0.00]       | 0.00<br>[0.00, 0.00]       | 0.00<br>[0.00, 0.00]       | 0.00<br>[0.00, 0.02]       | 0.00<br>[0.00, 0.00]       | 0.00<br>[0.00, 0.00]       | 0.00<br>[0.00, 0.00]       |
| <b>Consumption of canned food (portion per week)</b>                        | 1.25<br>[0.38, 2.75]       | 1.00<br>[0.27, 2.22]       | 1.50<br>[0.53, 3.50]       | 1.88<br>[0.75, 3.01]       | 1.77<br>[0.70, 2.28]       | 2.25<br>[0.87, 3.81]       | 0.50<br>[0.00, 2.00]       | 0.38<br>[0.00, 1.12]       | 0.75<br>[0.12, 2.50]       |
| <b>Cleaning duration (mins per week)</b>                                    | 277.50<br>[161.25, 427.50] | 292.50<br>[173.12, 495.00] | 262.50<br>[142.00, 396.12] | 308.62<br>[177.50, 504.38] | 321.16<br>[202.81, 524.75] | 302.40<br>[171.25, 446.25] | 211.25<br>[115.00, 355.00] | 240.00<br>[102.50, 399.88] | 174.75<br>[115.00, 306.25] |
| <b>Frequency of use of PCPs (number of times using a product per week)</b>  | 70.00<br>[53.75, 96.25]    | 65.72<br>[41.69, 91.69]    | 74.38<br>[58.00, 97.58]    | 86.20<br>[65.86, 103.00]   | 81.35<br>[65.59, 103.12]   | 86.76<br>[67.14, 102.75]   | 50.50<br>[32.50, 65.00]    | 41.12<br>[25.12, 59.00]    | 58.00<br>[51.50, 68.75]    |
| <b>Frequency of perfume use (times per week)</b>                            | 7.00<br>[1.00, 7.00]       | 5.00<br>[0.00, 7.00]       | 7.00<br>[3.50, 7.00]       | 7.00<br>[1.50, 7.00]       | 5.00<br>[0.75, 7.00]       | 7.00<br>[2.00, 7.00]       | 7.00<br>[1.00, 7.00]       | 4.50<br>[0.00, 7.00]       | 7.00<br>[5.00, 7.00]       |
| <b>Frequency of use of deodorant (times per week)</b>                       | 7.00<br>[2.88, 7.00]       | 7.00<br>[0.00, 7.00]       | 7.00<br>[7.00, 7.00]       | 7.00<br>[3.25, 7.00]       | 7.00<br>[1.00, 7.00]       | 7.00<br>[4.25, 7.00]       | 7.00<br>[3.00, 7.00]       | 7.00<br>[0.00, 7.00]       | 7.00<br>[7.00, 7.00]       |
| <b>Frequency of use of cosmetics (times of using the products per week)</b> | 7.00<br>[0.00, 22.06]      | 3.88<br>[0.00, 15.75]      | 14.00<br>[1.00, 28.00]     | 7.00<br>[0.18, 22.25]      | 6.62<br>[0.02, 16.88]      | 9.00<br>[1.00, 22.88]      | 7.00<br>[0.00, 21.12]      | 1.00<br>[0.00, 13.00]      | 20.50<br>[2.00, 28.00]     |

Median [IQR] values are presented in all variables

Abbreviations: PCPs: personal care products
