# Supplementary material for: Human Exposures to Bisphenol A, Bisphenol F and Chlorinated Bisphenol A Derivatives and Thyroid Function
Source: PubMed Central journal article supplement (PMC5082639; doi:10.1371/journal.pone.0155237), 2016-10-26
Supplement: pone.0155237.s002.pdf [file pone.0155237.s002.pdf]

Table S2. Overview of the positive and negative antibody status for all the study participants.

|                | <b>Overall</b>                  |                |                  |                 |          |          |
|----------------|---------------------------------|----------------|------------------|-----------------|----------|----------|
|                | <b>Total number of subjects</b> | <b>missing</b> | <b>% missing</b> |                 | <b>n</b> | <b>%</b> |
| <b>antiTg</b>  | 212                             | 83             | 39.2             | <b>Negative</b> | 119      | 92.2     |
|                |                                 |                |                  | <b>Positive</b> | 10       | 7.8      |
| <b>antiTPO</b> | 212                             | 73             | 34.4             | <b>Negative</b> | 108      | 77.7     |
|                |                                 |                |                  | <b>Positive</b> | 31       | 22.3     |
|                | <b>Cases</b>                    |                |                  |                 |          |          |
| <b>antiTg</b>  | 106                             | 39             | 36.8             | <b>Negative</b> | 84       | 95.5     |
|                |                                 |                |                  | <b>Positive</b> | 3        | 4.5      |
| <b>antiTPO</b> | 106                             | 32             | 30.2             | <b>Negative</b> | 62       | 83.8     |
|                |                                 |                |                  | <b>Positive</b> | 12       | 16.2     |
|                | <b>Controls</b>                 |                |                  |                 |          |          |
| <b>antiTg</b>  | 106                             | 44             | 41.5             | <b>Negative</b> | 55       | 88.7     |
|                |                                 |                |                  | <b>Positive</b> | 7        | 11.3     |
| <b>antiTPO</b> | 106                             | 41             | 38.7             | <b>Negative</b> | 46       | 70.8     |
|                |                                 |                |                  | <b>Positive</b> | 19       | 29.2     |
|                | <b>Cyprus</b>                   |                |                  |                 |          |          |
|                | <b>Total number of subjects</b> | <b>Missing</b> | <b>% missing</b> |                 | <b>n</b> | <b>%</b> |
| <b>antiTg</b>  | 122                             | 63             | 51.6             | <b>Negative</b> | 56       | 94.9     |
|                |                                 |                |                  | <b>Positive</b> | 3        | 5.1      |
| <b>antiTPO</b> | 122                             | 61             | 50               | <b>Negative</b> | 52       | 85.2     |
|                |                                 |                |                  | <b>Positive</b> | 9        | 14.8     |
|                | <b>Cyprus</b>                   |                |                  |                 |          |          |
|                | <b>Cases</b>                    | <b>Missing</b> | <b>% missing</b> |                 | <b>n</b> | <b>%</b> |
| <b>antiTg</b>  | 57                              | 30             | 52.6             | <b>Negative</b> | 26       | 96.3     |
|                |                                 |                |                  | <b>Positive</b> | 1        | 3.7      |
| <b>antiTPO</b> | 57                              | 28             | 49.1             | <b>Negative</b> | 28       | 96.6     |
|                |                                 |                |                  | <b>Positive</b> | 1        | 3.4      |
|                | <b>Controls</b>                 | <b>Missing</b> | <b>% missing</b> |                 | <b>n</b> | <b>%</b> |
| <b>antiTg</b>  | 65                              | 33             | 50.8             | <b>Negative</b> | 30       | 93.8     |
|                |                                 |                |                  | <b>Positive</b> | 2        | 6.2      |
| <b>antiTPO</b> | 65                              | 33             | 50.8             | <b>Negative</b> | 24       | 75.0     |
|                |                                 |                |                  | <b>Positive</b> | 8        | 25.0     |
|                | <b>Romania</b>                  |                |                  |                 |          |          |
|                | <b>Total number of subjects</b> | <b>missing</b> | <b>% missing</b> |                 | <b>n</b> | <b>%</b> |
| <b>antiTg</b>  | 90                              | 20             | 22.2             | <b>Negative</b> | 63       | 90       |

|                |                 |    |      |                 |                 |          |
|----------------|-----------------|----|------|-----------------|-----------------|----------|
|                |                 |    |      | <b>Positive</b> | 7               | 10       |
| <b>antiTPO</b> | 90              | 12 | 13.3 | <b>Negative</b> | 56              | 71.8     |
|                |                 |    |      | <b>Positive</b> | 22              | 28.2     |
|                | <b>Cases</b>    |    |      |                 | <b><i>n</i></b> | <b>%</b> |
| <b>antiTg</b>  | 49              | 9  | 18.4 | <b>Negative</b> | 38              | 95       |
|                |                 |    |      | <b>Positive</b> | 2               | 5        |
| <b>antiTPO</b> | 49              | 4  | 8.2  | <b>Negative</b> | 34              | 75.6     |
|                |                 |    |      | <b>Positive</b> | 11              | 24.4     |
|                | <b>Controls</b> |    |      |                 | <b><i>n</i></b> | <b>%</b> |
| <b>antiTg</b>  | 41              | 11 | 26.8 | <b>Negative</b> | 25              | 83.3     |
|                |                 |    |      | <b>Positive</b> | 5               | 16.7     |
| <b>antiTPO</b> | 41              | 8  | 19.5 | <b>Negative</b> | 22              | 66.7     |
|                |                 |    |      | <b>Positive</b> | 11              | 33.3     |
