# Supplementary material for: Human Exposures to Bisphenol A, Bisphenol F and Chlorinated Bisphenol A Derivatives and Thyroid Function
Source: PubMed Central journal article supplement (PMC5082639; doi:10.1371/journal.pone.0155237), 2016-10-26
Supplement: pone.0155237.s003.pdf [file pone.0155237.s003.pdf]

Table S3. Distribution of the urinary BPA, BPF and ClxBPA levels between the two countries.

|                                           | <b>Cyprus</b>        | <b>Romania</b>     | <b><i>p</i>-value</b> |
|-------------------------------------------|----------------------|--------------------|-----------------------|
| <i>N</i>                                  | 122                  | 90                 |                       |
| <b>BPA (ng/L)</b>                         | 1508 [789, 2806]     | 3778 [2134, 9050]  | <0.001                |
| <b>BPF (ng/L)</b>                         | 485 [365, 680]       | 416 [219, 822]     | 0.091                 |
| <b>ClxBPA (ng/L)</b>                      | 152 [141.00, 168.00] | 177 [158, 201]     | <0.001                |
| <b>Creatinine-adjusted concentrations</b> |                      |                    |                       |
| <b>BPA (ng/g)</b>                         | 2101 [1184, 4220]    | 4670 [2231, 10050] | <0.001                |
| <b>BPF (ng/g)</b>                         | 646 [398, 1327]      | 500 [271, 1138]    | 0.014                 |
| <b>ClxBPA (ng/g)</b>                      | 199.19 [120, 376]    | 201 [125, 394]     | 0.961                 |

Median[IQR] values are presented along with the *p*-value of the Wilcoxon test.

Abbreviations: BPA: bisphenol A, BPF: bisphenol F; ClxBPA: sum of 3-chlorobisphenol A (ClBPA), 3,5-dichlorobisphenol A (3,5-Cl<sub>2</sub>BPA) and 3,3'-dichlorobispheno A (3,3'-Cl<sub>2</sub>BPA)
