# Supplementary material for: Human Exposures to Bisphenol A, Bisphenol F and Chlorinated Bisphenol A Derivatives and Thyroid Function
Source: PubMed Central journal article supplement (PMC5082639; doi:10.1371/journal.pone.0155237), 2016-10-26
Supplement: pone.0155237.s004.pdf [file pone.0155237.s004.pdf]

Table S4. Intraclass correlation coefficient (and 95% CIs) and paired t-tests for the log-transformed values of BPA, BPF and ClxBPA (Cyprus).

|                      | Sample type    | <i>n</i> | GM   | GSD | Mean  | SD     | Median | 25th percentile | 75th percentile | Paired t-test | ICC  | 2.5% CI | 97.5% CI |
|----------------------|----------------|----------|------|-----|-------|--------|--------|-----------------|-----------------|---------------|------|---------|----------|
| <b>BPA (ng/L)</b>    | <b>Spot</b>    | 121      | 1575 | 2.5 | 2495  | 3295   | 1508   | 789             | 2806            | <0.001        | 0.16 | -0.03   | 0.34     |
|                      | <b>Morning</b> | 114      | 2727 | 3   | 11216 | 62924  | 2208   | 1457.5          | 4632            |               |      |         |          |
| <b>BPF (ng/L)</b>    | <b>Spot</b>    | 121      | 548  | 2.3 | 3181  | 27304  | 485    | 365             | 680             | 0.063         | 0.46 | 0.31    | 0.60     |
|                      | <b>Morning</b> | 114      | 637  | 2.3 | 1404  | 5833   | 550    | 402.2           | 878             |               |      |         |          |
| <b>ClxBPA (ng/L)</b> | <b>Spot</b>    | 121      | 160  | 1.2 | 164   | 39     | 152    | 141             | 168             | <0.001        | 0.09 | -0.09   | 0.28     |
|                      | <b>Morning</b> | 114      | 182  | 1.4 | 194   | 104    | 164    | 150             | 203             |               |      |         |          |
| <b>BPA (ng/g)</b>    | <b>Spot</b>    | 121      | 2229 | 2.5 | 3380  | 3626   | 2101   | 1184.3          | 4220            | <0.001        | 0.21 | 0.03    | 0.39     |
|                      | <b>Morning</b> | 112      | 3923 | 3.5 | 26119 | 172516 | 3545   | 1595.6          | 6885            |               |      |         |          |
| <b>BPF (ng/g)</b>    | <b>Spot</b>    | 121      | 775  | 2.6 | 2130  | 11351  | 646    | 397.8           | 1327            | 0.280         | 0.21 | 0.03    | 0.39     |
|                      | <b>Morning</b> | 112      | 897  | 3   | 2236  | 6048   | 815    | 445             | 1219            |               |      |         |          |
| <b>ClxBPA (ng/g)</b> | <b>Spot</b>    | 121      | 227  | 2.3 | 335   | 365    | 199    | 120.2           | 376             | 0.273         | 0.32 | 0.15    | 0.48     |
|                      | <b>Morning</b> | 112      | 259  | 2.4 | 514   | 1760   | 228    | 127.3           | 403             |               |      |         |          |
