# Supplementary material for: Human Exposures to Bisphenol A, Bisphenol F and Chlorinated Bisphenol A Derivatives and Thyroid Function
Source: PubMed Central journal article supplement (PMC5082639; doi:10.1371/journal.pone.0155237), 2016-10-26
Supplement: pone.0155237.s005.pdf [file pone.0155237.s005.pdf]

Table S5. Results of the sensitivity analysis for the determinants of urinary BPA, BPF and ClxBPA levels.

|                                                               | BPA (ng/L)                      |              | BPF (ng/L)                      |         | ClxBPA (ng/L)                   |              |
|---------------------------------------------------------------|---------------------------------|--------------|---------------------------------|---------|---------------------------------|--------------|
|                                                               | $\beta$ coefficient<br>(95% CI) | p-value      | $\beta$ coefficient<br>(95% CI) | p-value | $\beta$ coefficient<br>(95% CI) | p-value      |
| <b>20L Bottled water use (glasses per day; 1 glass=250mL)</b> | 0.056 (-0.002, 0.114)           | 0.062        | 0.022 (-0.027, 0.071)           | 0.375   | 0.013 (0.002, 0.024)            | <b>0.017</b> |
| <b>Microwave oven use (times per week)</b>                    | -0.022 (-0.077, 0.032)          | 0.426        | 0.056 (-0.003, 0.115)           | 0.067   | -0.010 (-0.021, 0.0004)         | 0.062        |
| <b>Canned food consumption (portion per week)</b>             | -0.004 (-0.043, 0.035)          | 0.844        | 0.017 (-0.015, 0.049)           | 0.305   | -0.004 (-0.012, 0.004)          | 0.307        |
| <b>Cleaning duration (mins per week)</b>                      | -0.0003 (-0.001, 0.0002)        | 0.295        | -0.00005 (-0.0005, 0.0004)      | 0.824   | 0.00005 (-0.0001, 0.0001)       | 0.365        |
| <b>PCPs use (number of times using a product per week)</b>    | 0.004 (0.001, 0.008)            | <b>0.020</b> | 0.003 (-0.0003, 0.006)          | 0.079   | 0.0001 (-0.001, 0.001)          | 0.72         |
| <b>Perfume use (times per week)</b>                           | -0.006 (-0.038, 0.026)          | 0.708        | -0.012 (-0.039, 0.014)          | 0.369   | -0.002 (-0.008, 0.004)          | 0.564        |
| <b>Deodorant use(times per week)</b>                          | 0.008 (-0.025, 0.040)           | 0.634        | 0.006 (-0.022, 0.035)           | 0.672   | 0.002 (-0.004, 0.008)           | 0.538        |
| <b>Cosmetics use (times per week)</b>                         | 0.007 (-0.003, 0.016)           | 0.164        | -0.004 (-0.012, 0.004)          | 0.344   | 0.002 (-0.0002, 0.003)          | 0.092        |

All models in the sensitivity analysis have been adjusted for: log-creatinine, study site, disease status, age and BMI

Abbreviations: BPA: bisphenol A, BPF: bisphenol F; ClxBPA: sum of 3-chlorobisphenol A (ClBPA), 3,5-dichlorobisphenol A (3,5-Cl<sub>2</sub>BPA) and 3,3'-dichlorobisphenol A (3,3'-Cl<sub>2</sub>BPA); PCPs: personal care products
