# Supplementary material for: Human Exposures to Bisphenol A, Bisphenol F and Chlorinated Bisphenol A Derivatives and Thyroid Function
Source: PubMed Central journal article supplement (PMC5082639; doi:10.1371/journal.pone.0155237), 2016-10-26
Supplement: pone.0155237.s008.pdf [file pone.0155237.s008.pdf]

Table S8. Sensitivity analysis results of the multivariate logistic regression models.

|                      | A1   |             |         | A2   |             |         |
|----------------------|------|-------------|---------|------|-------------|---------|
|                      | OR   | 95% CI      | P-value | OR   | 95% CI      | P-value |
| <b>BPA (ng/L)</b>    | 0.88 | 0.58 – 1.33 | 0.553   | 0.73 | 0.46 – 1.14 | 0.166   |
| <b>BPF (ng/L)</b>    | 1.39 | 0.82 – 2.38 | 0.222   | 1.42 | 0.84 – 2.44 | 0.2     |
| <b>ClxBPA (ng/L)</b> | 0.46 | 0.05 – 3.95 | 0.481   | 0.24 | 0.02 – 2.52 | 0.242   |
|                      | B1   |             |         | B2   |             |         |
|                      | OR   | 95% CI      | P-value | OR   | 95% CI      | P-value |
| <b>BPA (ng/L)</b>    | 0.92 | 0.60 – 1.40 | 0.69    | 0.76 | 0.48 – 1.18 | 0.223   |
| <b>BPF (ng/L)</b>    | 1.41 | 0.84 – 2.43 | 0.203   | 1.44 | 0.85 – 2.50 | 0.179   |
| <b>ClxBPA (ng/L)</b> | 0.59 | 0.06 – 5.26 | 0.635   | 0.29 | 0.02 – 3.07 | 0.308   |

Note: All concentrations are log-transformed and all models have been adjusted for log-transformed creatinine

Model details:

(A1) Adjusted for: age, BMI, TSH and FT4

(A2) Adjusted for: study site, age, BMI, TSH and FT4

(B1) Adjusted for: age, BMI, TSH, FT4 and spot iodine ( $\mu\text{g/L}$ )

(B2) Adjusted for: study site, age, BMI, TSH, FT4 and spot iodine ( $\mu\text{g/L}$ )

Abbreviations: BPA: bisphenol A, BPF: bisphenol F; ClxBPA: sum of 3-chlorobisphenol A (ClBPA), 3,5-dichlorobisphenol A (3,5-Cl2BPA) and 3,3'-dichlorobisphenol A (3,3'-Cl2BPA);

OR: odds ratio; CI: confidence intervals
