# Supplementary material for: Human Exposures to Bisphenol A, Bisphenol F and Chlorinated Bisphenol A Derivatives and Thyroid Function
Source: PubMed Central journal article supplement (PMC5082639; doi:10.1371/journal.pone.0155237), 2016-10-26
Supplement: pone.0155237.s009.pdf [file pone.0155237.s009.pdf]

**Table S9.** Test for trend in multivariate models where the outcome is log-transformed ft4, adjusted for age, BMI, study site and disease status (creatinine adjustment has been included in all models) for the whole study population.

| <b>Complete study population</b>                                                                                                                                                                                                  |                                                |                       |
|-----------------------------------------------------------------------------------------------------------------------------------------------------------------------------------------------------------------------------------|------------------------------------------------|-----------------------|
| <b>(A)</b>                                                                                                                                                                                                                        |                                                |                       |
|                                                                                                                                                                                                                                   | <b><math>\beta</math> coefficient (95% CI)</b> | <b><i>p</i>-value</b> |
| <b>BPA (ng/L)</b>                                                                                                                                                                                                                 | 0.023 (-0.001, 0.047)                          | <b>0.061</b>          |
| <b>BPF (ng/L)</b>                                                                                                                                                                                                                 | -0.011 (-0.046, 0.024)                         | 0.530                 |
| <b>ClxBPA (ng/L)</b>                                                                                                                                                                                                              | 0.058 (-0.068, 0.184)                          | 0.368                 |
| <b>(B)</b>                                                                                                                                                                                                                        |                                                |                       |
|                                                                                                                                                                                                                                   | <b><math>\beta</math> coefficient (95% CI)</b> | <b><i>p</i>-value</b> |
| <b>BPA (ng/L)</b>                                                                                                                                                                                                                 | 0.025 (0.001, 0.049)                           | <b>0.046</b>          |
| <b>BPF (ng/L)</b>                                                                                                                                                                                                                 | -0.006 (-0.042, 0.029)                         | 0.723                 |
| <b>ClxBPA (ng/L)</b>                                                                                                                                                                                                              | 0.063 (-0.065, 0.191)                          | 0.338                 |
| <b>(C)</b>                                                                                                                                                                                                                        |                                                |                       |
|                                                                                                                                                                                                                                   | <b><math>\beta</math> coefficient (95% CI)</b> | <b><i>p</i>-value</b> |
| <b>BPA (ng/L)</b>                                                                                                                                                                                                                 | -0.004 (-0.029, 0.021)                         | <b>0.737</b>          |
| <b>BPF (ng/L)</b>                                                                                                                                                                                                                 | 0.006 (-0.027, 0.039)                          | 0.732                 |
| <b>ClxBPA (ng/L)</b>                                                                                                                                                                                                              | <b>-0.087 (-0.214, 0.041)</b>                  | 0.184                 |
| <b>(D)</b>                                                                                                                                                                                                                        |                                                |                       |
|                                                                                                                                                                                                                                   | <b><math>\beta</math> coefficient (95% CI)</b> | <b><i>p</i>-value</b> |
| <b>BPA (ng/L)</b>                                                                                                                                                                                                                 | -0.005 (-0.030, 0.020)                         | <b>0.707</b>          |
| <b>BPF (ng/L)</b>                                                                                                                                                                                                                 | 0.006 (-0.027, 0.039)                          | 0.722                 |
| <b>ClxBPA (ng/L)</b>                                                                                                                                                                                                              | -0.087 (-0.215, 0.040)                         | 0.183                 |
| Model details:                                                                                                                                                                                                                    |                                                |                       |
| (A) Adjusted for: log creatinine                                                                                                                                                                                                  |                                                |                       |
| (B) Adjusted for: age, BMI and creatinine (g/L, log-transformed)                                                                                                                                                                  |                                                |                       |
| (C) Adjusted for: age, BMI, study site[Romania] and creatinine                                                                                                                                                                    |                                                |                       |
| (D) Adjusted for: age, BMI, study site[Romania], disease status[case] (and creatinine)                                                                                                                                            |                                                |                       |
| Abbreviations: BPA: bisphenol A, BPF: bisphenol F; ClxBPA: sum of 3-chlorobisphenol A (ClBPA), 3,5-dichlorobisphenol A (3,5-Cl <sub>2</sub> BPA) and 3,3'-dichlorobispheno A (3,3'-Cl <sub>2</sub> BPA); CI: confidence intervals |                                                |                       |
