# Supplementary material for: Human Exposures to Bisphenol A, Bisphenol F and Chlorinated Bisphenol A Derivatives and Thyroid Function
Source: PubMed Central journal article supplement (PMC5082639; doi:10.1371/journal.pone.0155237), 2016-10-26
Supplement: pone.0155237.s010.pdf [file pone.0155237.s010.pdf]

Table S10. Linear regression analysis of the exposure habits as determinants of spot urinary BPA levels (creatinine unadjusted, log-transformed) for the cases and controls, separately.

| Cases                                                  | BPA (ng/L)                   |                 |
|--------------------------------------------------------|------------------------------|-----------------|
|                                                        | $\beta$ coefficient (95% CI) | <i>p</i> -value |
| 20L Bottled water use (glasses per day; 1 glass=250mL) | 0.143 (0.026, 0.261)         | <b>0.019</b>    |
| Microwave oven use (times per week)                    | -0.004 (-0.101, 0.092)       | 0.928           |
| Canned food consumption (portion per week)             | -0.026 (-0.100, 0.047)       | 0.485           |
| Cleaning duration (mins per week)                      | -0.001 (-0.002, -0.0002)     | 0.017           |
| PCPs use (number of times using a product per week)    | 0.008 (0.003, 0.013)         | <b>0.003</b>    |
| Perfume use (times per week)                           | 0.011 (-0.033, 0.055)        | 0.638           |
| Deodorant use (times per week)                         | 0.015 (-0.028, 0.059)        | 0.490           |
| Cosmetics use (times per week)                         | 0.008 (-0.007, 0.024)        | 0.292           |
| Controls                                               | $\beta$ coefficient (95% CI) | <i>p</i> -value |
| 20L Bottled water use (glasses per day; 1 glass=250mL) | 0.071 (-0.023, 0.164)        | <b>0.142</b>    |
| Microwave oven use (times per week)                    | -0.006 (-0.106, 0.094)       | 0.903           |
| Canned food consumption (portion per week)             | 0.0005 (-0.065, 0.066)       | 0.989           |
| Cleaning duration (mins per week)                      | -0.00002 (-0.001, 0.001)     | 0.965           |
| PCPs use (number of times using a product per week)    | -0.003 (-0.011, 0.005)       | <b>0.529</b>    |
| Perfume use (times per week)                           | -0.076 (-0.139, -0.013)      | 0.022           |
| Deodorant use (times per week)                         | -0.008 (-0.080, 0.065)       | 0.838           |
| Cosmetics use (times per week)                         | -0.001 (-0.016, 0.015)       | 0.920           |

\*The models have been adjusted for: log-creatinine, study site, disease status, age and BMI  
Abbreviations: BPA: bisphenol A, BPF: bisphenol F; ClxBPA: sum of 3-chlorobisphenol A (ClBPA), 3,5-dichlorobisphenol A (3,5-Cl<sub>2</sub>BPA) and 3,3'-dichlorobisphenol A (3,3'-Cl<sub>2</sub>BPA); PCPs: personal care products, CI: confidence intervals
